# Supplementary material for: Circulating microRNAs demonstrate limited diagnostic potential for diabetic retinopathy in the population of Kazakhstan
Source: PeerJ. 2025 Apr 11;13:e19259. doi: 10.7717/peerj.19259 (PMC11995893; doi:10.7717/peerj.19259)
Supplement: Supplemental Information 1 [file peerj-13-19259-s001.xlsx]

## Sheet: Database
Id	Status	DR stage	DME	Sex	Ethnic group	Year of birth	Age, years	Year of diagnosis	Age of onset, years	Diabetes duration, years	Weigth, kg	Heigth, сm	IMT	Blood glucose (fasting), mmol/L	HbA1, %	GFR	Smoking, sigarettes per day	Alcohol consumption	Family history of diabetes, yes/no	Relative with diabetes	Medications	(Ct) miR-150-5p	(Ct) miR-21-5p	(Ct) miR-24-3p	(Ct) miR-29b-3p	(Ct) miR-328-3p	(Ct) miR-423-3p	(Ct) miR-191-5p	(Ct) miR-ath-159a	(Ct) miR-15-5p	(Ct) miR-221-3p	(Ct) miR-23a-3p	(Ct) miR-26b-5p	(dCt) miR-150-5p	(dCt) miR-21-5p	(dCt) miR-24-3p	(dCt) miR-29b-3p	(dCt) miR-328-3p	(dCt) miR-423-3p	(dCt) miR-15a-5p	(dCt) miR-221-3p	(dCt) miR-23a-3p	(dCt) miR-26b-5p
R1	T2DM patients with DR	PPDR	noDME	female	Kazakh	1958	63	2002	44	18	65	170	22.4	10			no	no	no		Insulin	23.923	20.643	22.998	24.78	28.3175	27.063	25.253	14.4745	19.75	22.8185	24.392	23.7785	1.33	4.61	2.255	0.473001	-3.0645	-1.81	5.503	2.4345	0.861	1.4745
R2	T2DM patients with DR	NPDR	noDME	male	Kazakh	1962	59	1999	37	20	90	175	29.3	6.9		17	no	no	yes	no data	Insulin	20.1563	19.1377	20.8837	21.5037	26.0667	23.8883	20.6837	21.0997	16.697	22.062	22.535	19.541	0.527334	1.546	-0.2	-0.82	-5.383	-3.20467	3.98933	-1.37633	-1.849	1.145
R3	T2DM patients with DR	NPDR	noDME	female	Kazakh	1974	47	2005	31	15	103	165	37.8	13.7	0.13		no	no	no		Metformin	21.9837	20.1487	21.9103	23.1	26.988	26.134	22.8647	21.6283	20.497	23.252	23.693	22.345	0.880999	2.716	0.954333	-0.23533	-4.12333	-3.26933	2.473	-0.28233	-0.723	0.6245
R4	T2DM patients with DR	PPDR	noDME	male	Kazakh	1962	59	1995	33	25	95	170	32.8	5.1	0.07	7	no	no	no		Insulin	23.752	19.7403	21.4737	21.7823	26.4323	25.5753	23.12	21.307					-0.632	3.37967	1.64633	1.33767	-3.31233	-2.45533
R5	T2DM patients with DR	NPDR	noDME	female	Kazakh	1943	78	2006	63	14	75	168	26.5	11		39	no	no	no		Insulin	21.9363	21.3653	22.864	23.8847	27.1497	25.748	23.729	21.408	21.184	22.854	24.098	23.247	1.79267	2.36367	0.865	-0.15567	-3.42067	-2.019	2.441	0.771	-0.47267	0.378667
R6	T2DM patients with DR	PDR	DME	male	Kazakh	1965	56	2010	45	10	75	178	23.6	7.1	0.101		no	no	no		Metformin	21.1883	20.2853	21.9583	22.754	27.11	26.186	22.546	20.9063	19.817	23.543	23.768	21.674	1.35767	2.26067	0.587667	-0.208	-4.564	-3.64	2.86833	-0.85733	-1.08233	1.01133
R7	T2DM patients with DR	NPDR	noDME	male	Russian	1960	61	1998	38	22	82	172	28.3	14			20	on holidays	no		Insulin	23.143	21.1535	22.74	24.2905	27.6085	25.9565	23.58	13.2715	20.103	22.8725	23.9635	22.3145	0.437	2.4265	0.84	-0.7105	-4.0285	-2.3765	3.477	0.7075	-0.3835	1.2655
R8	T2DM patients with DR	NPDR	noDME	female	Kazakh	1967	54	2005	38	15	70	165	25.7	12.7			no	no	no		Insulin	24.5295	23.3245	25.382	26.7735	31.0905	28.0105	26.1445	12.756	22.329	24.4575	27.135	24.444	1.615	2.82	0.7625	-0.629	-4.946	-1.866	3.8155	1.687	-0.9905	1.7005
R9	T2DM patients with DR	NPDR	noDME	female	Kazakh	1951	70	2010	59	10	63	162	24	10			no	no	yes	Son	Insulin	24.296	23.305	24.176	26.1365	28.9235	26.963	25.8405	14.702	22.8	24.175	26.7635	24.355	1.5445	2.5355	1.6645	-0.296	-3.083	-1.1225	3.0405	1.6655	-0.923	1.4855
R10	T2DM patients with DR	PDR	noDME	male	Uigur	1966	55	2014	48	6	74	170	25.6	8.6		99	no	no	no		Insulin	22.5865	22.006	23.489	24.5175	28.257	26.475	24.717	13.8355	21.7155	23.913	25.8845	23.2295	2.1305	2.711	1.228	0.1995	-3.54	-1.758	3.0015	0.804	-1.1675	1.4875
R11	T2DM patients with DR	NPDR	noDME	male	Uigur	1963	58	2001	38	19	80	170	27.6	11.3			no	no	yes	Sister	Insulin	22.064	20.395	21.9955	22.6065	27.7655	25.6695	22.686	13.977	18.839	22.7745	23.458	21.2265	0.622	2.291	0.6905	0.0795	-5.0795	-2.9835	3.847	-0.0885	-0.772	1.4595
R12	T2DM patients with DR	PDR	noDME	male	Kazakh	1987	34	1998	11	22	67	172	22.64	12	0.146		10	on holidays	no		Insulin	21.858	21.7493	22.849	23.2843	27.9517	26.2297	23.0343	20.747	19.842	23.543	24.486	21.755	1.17633	1.285	0.185333	-0.25	-4.91733	-3.19533	3.20967	-0.49133	-1.43433	1.29633
R13	T2DM patients with DR	PPDR	noDME	male	Kurd	1963	58	2000	37	20	80	175	26.1	13	0.1187		no	no	yes	Mother	Insulin	23.7485	22.248	23.1995	24.9675	27.8805	26.7045	24.126	13.13	21.2905	23.102	24.4505	22.938	0.3775	1.878	0.926499	-0.8415	-3.7545	-2.5785	2.8355	1.024	-0.3245	1.188
R14	T2DM patients with DR	NPDR	noDME	female	Russian	1951	70	2000	49	20	86	164	31.9	10.8		94	no	no	no		Insulin	21.701	20.9725	22.489	23.3195	26.846	25.3105	22.835	17.0815	19.421	22.7805	23.9895	21.423	1.134	1.8625	0.346001	-0.4845	-4.011	-2.4755	3.414	0.0545	-1.1545	1.412
R15	T2DM patients with DR	PDR	DME	male	Kazakh	1967	54	2015	48	5	110	180	33.9	9	0.206	114	no	no	yes	Father	Insulin	20.172	20.4177	21.4387	22.6765	25.927	25.112	22.028	19.7027					1.856	1.61033	0.589333	-0.6485	-3.899	-3.084
R16	T2DM patients with DR	PPDR	noDME	male	Uigur	1963	58	2005	42	15	94	174	31	6.2			no	no	yes	Mother, Brother	Insulin	22.4545	21.4025	22.8315	24.932	28.587	27.0045	24.4725	13.4515	21.6445	22.762	24.0435	23.745	2.018	3.07	1.641	-0.4595	-4.1145	-2.532	2.828	1.7105	0.429	0.7275
R17	T2DM patients with DR	PDR	noDME	male	Kazakh	1956	65	2013	57	7	62	160	24.2	7.4	0.124	68	no	no	no		Metformin	20.7687	19.968	21.0683	21.8547	25.222	23.983	21.169	19.2933	19.073	21.908	23.371	20.391	0.400333	1.201	0.100666	-0.68567	-4.053	-2.814	2.27	-0.565	-2.02767	0.952001
R18	T2DM patients with DR	NPDR	noDME	female	Kazakh	1966	55	2012	46	8	74	160	28.9	5.8	0.121		no	no	no		Insulin	21.7143	22.088	23.054	24.722	27.261	26.267	23.2813	15.69	20.997	23.924	24.766	22.782	1.567	1.19333	0.227334	-1.44067	-3.97967	-2.98567	2.41867	-0.50833	-1.35067	0.633999
R19	T2DM patients with DR	NPDR	noDME	female	Kazakh	1952	69	2007	55	13	80	153	34.1	10.6			no	no	no		Glimepiride	22.582	20.313	21.882	23.021	27.09	24.805	22.3935	13.3225	19.015	22.11	23.146	21.315	-0.1885	2.0805	0.5115	-0.6275	-4.6965	-2.4115	3.3785	0.2835	-0.7525	1.0785
R20	T2DM patients with DR	PPDR	noDME	male	Kazakh	1962	59	2009	47	7	86	170	29.7	6.7		97	no	no	yes	Brother	Glimepiride, Metformin	21.8057	20.375	21.2547	22.3887	26.1127	24.705	21.4997	19.733	19.129	22.247	23.104	20.549	-0.306	1.12467	0.245	-0.889	-4.613	-3.20533	2.37867	-0.73933	-1.59667	0.958333
R21	T2DM patients with DR	PPDR	noDME	female	Uigur	1940	81	2019	79	1	72	165	26.4	7			no	no	no		Metformin	21.102	19.4555	21.6935	21.9825	26.695	24.269	21.114	13.673	17.0655	22.0275	24.062	20.024	0.012	1.6585	-0.5795	-0.8685	-5.581	-3.155	4.0485	-0.9135	-2.948	1.09
R22	T2DM patients with DR	PPDR	noDME	male	Uigur	1966	55	2017	51	3	70	170	24.2	7.8	0.13	97	5	on holidays	no		Insulin	23.244	21.653	22.578	24.336	29.5185	26.8415	23.6485	13.3725	20.6935	23.298	24.2705	22.468	0.404499	1.9955	1.0705	-0.6875	-5.87	-3.193	2.955	0.350499	-0.622	1.1805
R23	T2DM patients with DR	PPDR	noDME	female	Kazakh	1960	61	2003	43	17	90	165	33	8.9			no	no	yes	Sister	Insulin	23.0115	21.3915	23.083	24.98	28.3335	26.7235	24.016	15.9895	21.9325	23.1375	24.6005	22.941	1.0045	2.6245	0.933001	-0.964	-4.3175	-2.7075	2.0835	0.8785	-0.5845	1.075
R24	T2DM patients with DR	NPDR	noDME	female	Kazakh	1977	44	2020	43	0.17	70	160	27.3	10.2			no	no	no		does not take	21.201	20.0865	21.8035	22.8105	25.8955	24.511	22.143	14.9555	19.5835	21.834	22.534	21.546	0.941999	2.0565	0.339499	-0.6675	-3.7525	-2.368	2.5595	0.309	-0.391	0.596999
R25	T2DM patients with DR	PPDR	noDME	female	Uigur	1954	67	2012	58	8	78	165	28.6	13	0.136	77	no	no	yes	Brother	Metformin	19.938	19.4285	20.6125	22.4735	25.412	23.596	21.2165	13.6315	18.851	20.7285	21.9735	20.547	1.2785	1.788	0.604	-1.257	-4.1955	-2.3795	2.3655	0.488001	-0.757	0.6695
R26	T2DM patients with DR	PPDR	noDME	male	Kazakh	1973	48	2006	33	14	83	164	30.8	12.5	0.119		no	no	no		Insulin	21.845	21.353	22.594	23.6197	26.9847	26.455	23.0137	20.3417	20.625	23.556	23.898	22.006	1.16867	1.66067	0.419666	-0.606	-3.971	-3.44133	2.322	-0.60967	-0.951	0.940999
R27	T2DM patients with DR	NPDR	noDME	female	Russian	1961	60	2010	49	10	78	165	28.6	12.3	0.091	91	no	no	yes	Mother, Sister	Metformin, Canagliflozin	22.136	21.802	22.8735	24.7465	28.1155	26.431	24.2245	14.144	22.5045	23.4155	24.205	22.765	2.0885	2.4225	1.351	-0.522	-3.891	-2.2065	1.72	0.809	0.0195	1.4595
R28	T2DM patients with DR	PPDR	noDME	female	Uigur	1964	57	2015	51	5	75	155	31.2	17.4	0.14	49	no	no	no		Insulin	22.9845	22.172	23.2985	25.1975	28.552	27.04	24.267	14.749	22.288	22.9195	24.501	22.9835	1.2825	2.095	0.9685	-0.9305	-4.285	-2.773	1.979	1.3475	-0.234	1.2835
R29	T2DM patients with DR	PDR	noDME	male	Kazakh	1962	59	1993	31	27	68	168	24	8.5		95	no	no	yes	Mother	Insulin	21.3597	20.8943	22.401	23.194	27.446	25.796	22.544	19.7593	19.538	23.33	24	21.629	1.18433	1.64967	0.143	-0.65	-4.902	-3.252	2.89133	-0.9	-1.57083	0.801
R30	T2DM patients with DR	PDR	DME	female	Uigur	1960	61	2002	42	18	85	175	27.7	12.3			no	no	no		Insulin	23.6915	22.237	23.6605	25.2335	28.38	26.0985	24.4235	13.5675	21.894	23.2215	25.65	23.0345	0.732	2.1865	0.763	-0.81	-3.9565	-1.675	2.5295	1.202	-1.2265	1.389
R31	T2DM patients with DR	NPDR	noDME	female	Kazakh	1951	70	2006	55	14	95	158	38.1	5.1	0.095	67	no	no	yes	Brother	Metformin	21.2107	20.865	23.0383	23.61	28.1653	26.9133	24.735	19.9373	21.612	23.75	24.994	23.005	3.52433	3.87	1.69667	1.125	-3.43033	-2.17833	3.687	1.54833	0.304666	2.29367
R32	T2DM patients with DR	PPDR	noDME	female	Uigur	1963	58	2009	46	11	57	159	22.5	20.5		83	no	no	yes	Sisters	Insulin	20.977	20.359	21.9945	23.4885	26.9805	24.7905	22.3515	13.5265	19.0555	22.087	23.147	20.8885	1.3745	1.9925	0.356999	-1.137	-4.629	-2.439	3.296	0.2645	-0.7955	1.463
R33	T2DM patients with DR	PPDR	noDME	female	Kazakh	1994	27	2011	17	9	60	153	25.6	7.8	0.0901	96	no	no	no		Insulin	20.809	21.0677	21.8257	22.4963	26.282	25.088	22.073	19.4077	18.927	22.839	24.01	20.713	1.264	1.00533	0.247333	-0.42333	-4.209	-3.015	3.284	-0.62733	-1.79867	1.49867
R34	T2DM patients with DR	PPDR	noDME	female	Russian	1970	51	2010	40	10	49	159	19.4	14.2	0.1342	42	no	on holidays	no		Insulin	23.3395	22.859	24.263	25.968	30.5905	27.8555	25.432	15.1165	21.927	24.4475	25.2785	23.7615	2.0925	2.573	1.169	-0.536	-5.1585	-2.4235	3.505	0.9845	0.153501	1.6705
R35	T2DM patients with DR	PDR	DME	female	Russian	1957	64	1996	39	24	69	158	27.64	8			no	no	yes	Mother	Insulin	21.8	20.2215	22.2215	23.28	27.1975	26.3825	23.5985	10.6085	19.006	22.4515	23.7195	21.448	1.7985	3.377	1.377	0.3185	-3.599	-2.784	4.5925	1.147	-0.121	2.1505
R36	T2DM patients with DR	PPDR	DME	female	Kazakh	1963	58	2005	42	15	63	158	25.2	8.8	0.0898	99	no	on holidays	yes	Mother	Insulin	20.9063	20.852	22.3417	23.046	27.4267	25.5473	22.3523	19.2573	19.263	23.535	24.547	21.347	1.446	1.50033	0.010668	-0.69367	-5.07433	-3.195	3.62467	-0.64733	-1.65967	1.54067
R37	T2DM patients with DR	NPDR	noDME	female	Kazakh	1954	67	2016	62	4	70	168	24.8	7.6			no	no	yes	Mother	Insulin	22.046	19.9425	22.0565	22.372	27.0025	25.4475	22.616	11.9625	17.941	22.028	23.7335	20.578	0.570001	2.6735	0.559501	0.244	-4.3865	-2.8315	4.675	0.588	-1.1175	2.038
R38	T2DM patients with DR	PDR	noDME	female	Kazakh	1962	59	1999	37	21	55	149	24.8	5.6		47	no	no	no		Insulin	18.2197	19.0103	20.6423	20.6037	24.8193	23.539	19.7127	18.9407	17.029	22.355	23.144	19.06	1.493	0.702333	-0.92967	-0.891	-5.10667	-3.82633	2.82167	-2.50433	-3.294	0.790667
R39	T2DM patients with DR	PPDR	noDME	female	Russian	1951	70	2015	64	5	78	160	30.5	15.5			no	no	no		Gliclazide, Metformin	22.159	21.404	22.3725	24.5515	27.5165	25.3165	22.7345	11.8055	21.308	22.6345	23.6275	22.2195	0.5755	1.3305	0.362001	-1.817	-4.782	-2.582	1.4265	0.100001	-0.893	0.515001
R40	T2DM patients with DR	PPDR	noDME	female	Kazakh	1937	84	2019	82	1	94	165	34.5	6.3	0.133	65	no	no	no		Insulin	20.3623	19.3567	20.93	22.572	25.598	24.334	21.4447	18.564	20.099	22.23	23.236	20.836	1.08233	2.088	0.514666	-1.12733	-4.15333	-2.88933	1.75933	-0.371	-1.377	1.023
R41	T2DM patients with DR	NPDR	noDME	female	Kazakh	1963	58	2010	47	10	86	153	36.7	8.1	0.09	91	no	no	yes	Mother, Sister	Metformin	19.773	20.52	21.4667	22.7605	26.495	25.4137	22.242	18.4513	20.118	23.044	23.352	21.715	2.469	1.722	0.775333	-0.5185	-4.253	-3.17167	2.325	-0.60067	-0.90867	0.728
R42	T2DM patients with DR	PPDR	noDME	male	Kazakh	1954	67	2002	48	18	84	165	30.9	6.3	0.07	66	no	no	no		Insulin	22.9257	21.6723	23.147	24.5563	28.8467	26.857	24.1903	19.8797	21.597	23.491	24.673	22.773	1.26467	2.518	1.04333	-0.366	-4.65633	-2.66667	2.63833	0.744667	-0.437	1.463
R43	T2DM patients with DR	PPDR	noDME	female	Kazakh	1973	48	2004	31	16	71	160	27.7	7	0.08	106	no	no	yes	Mother	Insulin	22.0447	21.7943	22.7493	24.092	28.099	26.5543	23.9013	19.573	21.209	24.192	24.129	22.94	1.85667	2.107	1.152	-0.19067	-4.19767	-2.653	2.63867	-0.34433	-0.28133	0.907666
R44	T2DM patients with DR	NPDR	noDME	female	Uigur	1969	52	2018	49	2	70	159	27.7	7.8		110	no	no	no		Insulin	23.498	22.928	24.823	25.933	30.643	28.5	25.6735	14.6405	23.0315	24.801	25.9445	24.1745	2.1755	2.7455	0.8505	-0.2595	-4.9695	-2.8265	2.642	0.872499	-0.271	1.499
R45	T2DM patients with DR	PPDR	noDME	male	Kazakh	1970	51	2008	38	12	72	173	24.1	20	0.156		no	no	no		Insulin	23.447	23.4685	24.726	26.4305	30.606	28.3135	25.434	14.679	22.7215	24.58	25.523	23.525	1.987	1.9655	0.708	-0.9965	-5.172	-2.8795	2.7125	0.854	-0.089	1.909
R46	T2DM patients with DR	PPDR	noDME	male	Russian	1968	53	2012	44	8	106	176	34.2	17	0.0981	65	no	no	yes	Mother, Father	Insulin	22.177	22.065	23.9015	25.1065	29.89	27.7165	24.964	15.5625	21.9515	23.793	25.205	23.0195	2.787	2.899	1.0625	-0.1425	-4.926	-2.7525	3.0125	1.171	-0.241	1.9445
R47	T2DM patients with DR	PPDR	noDME	female	Turk	1957	64	2006	49	14	50	158	20.3	12	0.084	96	no	no	no		Glimepiride, Metformin	22.3805	21.493	22.825	24.944	29.125	26.7225	24.3175	12.3535	21.543	23.0605	24.17	22.935	1.937	2.8245	1.4925	-0.6265	-4.8075	-2.405	2.7745	1.257	0.1475	1.3825
R48	T2DM patients with DR	PPDR	DME	female	Russian	1958	63	2004	46	16	94	158	37.7	8.7	0.093		no	no	no		Metformin	22.3715	22.0195	24.1525	25.2955	30.2885	27.515	25.4945	12.842	22.159	23.603	25.432	23.63	3.123	3.475	1.342	0.198999	-4.794	-2.0205	3.3355	1.8915	0.0625	1.8645
R49	T2DM patients with DR	PDR	noDME	female	Kazakh	1963	58	2009	46	11	94	153	40.2	13.8		84	no	no	no		Insulin	19.85	18.922	20.7857	21.46	25.4477	24.157	20.9383	18.7867					1.08833	2.01633	0.152666	-0.52167	-4.50933	-3.21867
R50	T2DM patients with DR	NPDR	noDME	female	Udmurt	1947	74	2008	61	12	65	150	28.9	8	0.067		no	no	no		Insulin	22.2895	21.1055	22.312	23.6905	27.3295	25.943	22.6925	13.3335	19.742	22.507	23.73	21.4135	0.403	1.587	0.380501	-0.998	-4.637	-3.2505	2.9505	0.1855	-1.0375	1.279
R51	T2DM patients with DR	NPDR	DME	female	Kazakh	1973	48	2005	32	15	108	162	41.2	17	0.1108	139	no	no	yes	Brother	Insulin	20.153	18.5883	21.016	21.6087	26.1873	24.5863	21.9027	17.8807	18.111	21.298	22.986	20.706	1.74967	3.31433	0.886667	0.293999	-4.28467	-2.68367	3.973	0.785334	-0.90267	1.378
R52	T2DM patients with DR	PDR	noDME	male	Kazakh	1970	51	2004	34	16	80	172	27	18	0.1112	87	7	on holidays	yes	Mother	Insulin	20.1593	21.0327	22.485	22.879	27.23	25.9903	22.9013	16.9403	19.911	23.54	24.259	21.389	2.742	1.86867	0.416334	0.022334	-4.32867	-3.089	3.01933	-0.60933	-1.32817	1.54167
R53	T2DM patients with DR	PDR	noDME	male	Kazakh	1968	53	2002	34	19	78	168	27.6	8			10	on holidays	yes	Mother, Brother	Insulin	22.603	21.9575	23.519	24.934	28.539	26.584	23.602	13.488	20.9295	23.4685	25.186	22.454	0.999001	1.6445	0.083	-1.332	-4.937	-2.982	2.6725	0.1335	-1.584	1.148
R54	T2DM patients with DR	NPDR	DME	male	Kazakh	1946	75	1998	52	23	65	165	23.9	13			no	no	no		Insulin	21.649	20.4815	22.606	23.213	27.679	25.3935	22.673	13.2565	18.927	22.577	24.024	20.914	1.024	2.1915	0.066999	-0.54	-5.006	-2.7205	3.746	0.096	-1.351	1.759
R55	T2DM patients with DR	PPDR	noDME	male	Kazakh	1945	76	2005	60	16	68	159	26.9	9.6			no	no	no		Insulin	24.4475	23.646	25.065	26.2705	30.5955	27.7425	25.5045	15.6165	22.923	24.7445	26.112	23.542	1.057	1.8585	0.439501	-0.766	-5.091	-2.238	2.5815	0.76	-0.6075	1.9625
R56	T2DM patients with DR	PPDR	noDME	female	Kazakh	1956	65	2006	50	15	79	159	31	11			no	no	no		Insulin	21.9105	21.3225	23.1165	24.0265	28.0185	27.006	23.451	12.995	20.338	23.1485	24.309	21.7595	1.5405	2.1285	0.3345	-0.5755	-4.5675	-3.555	3.113	0.3025	-0.858	1.6915
R57	T2DM patients with DR	NPDR	noDME	female	Uigur	1980	41	2018	38	3	68	159	27	5.8			no	on holidays	no		Insulin	24.238	23.5265	25.6915	26.6615	30.0615	29.2385	25.805	14.805	23.1595	24.923	26.355	24.1855	1.567	2.2785	0.1135	-0.8565	-4.2565	-3.4335	2.6455	0.882001	-0.55	1.6195
R58	T2DM patients with DR	NPDR	DME	female	Russian	1952	69	2006	54	15	80	163	30.1	6.3			no	no	no		Gliclazide	22.1405	21.934	23.199	25.0915	28.764	26.8785	23.749	14.9825	21.5265	23.2795	24.8835	22.396	1.6085	1.815	0.55	-1.3425	-5.015	-3.1295	2.2225	0.4695	-1.1345	1.353
R59	T2DM patients with DR	PDR	noDME	female	Kazakh	1957	64	2006	49	15	63	170	21.8	7.8			no	no	no		Gliclazide	21.9435	21.897	23.174	24.489	28.016	26.1865	23.5275	14.0315	20.8525	23.1505	24.789	22.139	1.584	1.6305	0.353499	-0.9615	-4.4885	-2.659	2.675	0.377	-1.2615	1.3885
R60	T2DM patients with DR	NPDR	noDME	male	Korean	1952	69	2012	60	9	75	169	26.3	6.8			no	no	yes	Brother	Metformin	22.587	21.477	22.137	25.2535	27.1045	25.5755	22.925	13.441	21.459	22.6905	23.381	23.2635	0.338	1.448	0.788001	-2.3285	-4.1795	-2.6505	1.466	0.2345	-0.456	-0.3385
R61	T2DM patients with DR	PPDR	noDME	female	Russian	1949	72	2000	51	21	85	168	30.1	9	0.1162	65	no	no	no		Insulin	22.486	22.402	23.9645	24.614	29.899	27.1475	24.697	17.2685	21.197	24.383	25.4165	23.4005	2.211	2.295	0.7325	0.083	-5.202	-2.4505	3.5	0.314	-0.7195	1.2965
R62	T2DM patients with DR	NPDR	noDME	male	Kazakh	1959	62	2007	48	14	95	175	31	10	0.0823		20	on holidays	yes	Mother	Insulin	20.1027	20.8913	22.0017	22.5717	27.7683	25.382	22.5533	13.5773	20.107	23.1	24.089	21.543	2.45067	1.662	0.551667	-0.01833	-5.215	-2.82867	2.537	-0.45633	-1.445	1.10033
R63	T2DM patients with DR	NPDR	DME	female	Kazakh	1965	56	2008	43	13	75	168	26.6	7.4		108	no	no	yes	Mother	Insulin	21.201	20.795	22.181	23.4705	28.1885	25.9915	22.2355	13.9235	19.172	22.685	23.7345	20.438	1.0345	1.4405	0.0545	-1.235	-5.953	-3.756	3.0635	-0.4495	-1.499	1.7975
R64	T2DM patients with DR	NPDR	noDME	female	Kazakh	1976	45	2006	30	15	65	170	22.5	7.8		101	no	no	yes	Sister	Insulin	22.1095	22.097	23.8495	24.115	29.1535	26.8705	23.601	15.4695	20.3115	24.1655	25.6925	22.2085	1.4915	1.504	-0.2485	-0.514	-5.5525	-3.2695	3.2895	-0.5645	-2.0915	1.3925
R65	T2DM patients with DR	PDR	noDME	male	Kazakh	1961	60	2020	59	0.5	110	182	33.2	6.5			no	no	yes	Sister	Insulin	20.295	21.333	22.5325	23.6315	28.132	25.5075	22.8755	15.322	19.934	23.0025	24.0125	21.61	2.5805	1.5425	0.343	-0.756	-5.2565	-2.632	2.9415	-0.127	-1.137	1.2655
R66	T2DM patients with DR	NPDR	noDME	female	Uigur	1954	67	2003	49	18	85	167	30.5	5.6			no	no	yes	Mother, Brother	Insulin	21.789	21.2845	23.234	23.8875	28.539	26.3155	23.2185	12.876	19.81	23.574	24.692	21.7735	1.4295	1.934	-0.0155	-0.669	-5.3205	-3.097	3.4085	-0.3555	-1.4735	1.445
R67	T2DM patients with DR	NPDR	noDME	male	Kazakh	1973	48	2016	43	6	87	170	30.1	6.8			no	no	yes	Mother	Metformin	20.998	20.626	22.2055	23.1095	28.5075	25.6215	22.704	14.2525	19.264	22.4755	23.656	21.5375	1.706	2.078	0.498501	-0.4055	-5.8035	-2.9175	3.44	0.2285	-0.952	1.1665
R68	T2DM patients with DR	NPDR	noDME	female	Kazakh	1953	68	2017	64	7	75	166	27.2	7			no	no	no		Glimepiride, Metformin	23.5155	23.804	24.668	26.8385	31.057	28.5995	25.826	15.07	24.262	24.456	26.4865	24.44	2.3105	2.022	1.158	-1.0125	-5.231	-2.7735	1.564	1.37	-0.6605	1.386
R69	T2DM patients with DR	PPDR	DME	female	Kazakh	1941	80	2004	63	17	78	170	27	5			no	no	no		Gliclazide, Metformin	22.202	20.975	22.392	23.256	28.636	26.699	23.199	17.3875	19.2195	22.57	23.9555	21.352	0.997001	2.224	0.807001	-0.057	-5.437	-3.5	3.9795	0.629001	-0.7565	1.847
R70	T2DM patients with DR	PPDR	noDME	male	Kazakh	1944	77	2015	71	6	81	180	25	9			no	no	no		Metformin	23.0595	22.2085	24.159	24.6485	30.2495	27.232	24.8035	13.3785	21.048	23.9955	25.4155	23.2985	1.744	2.595	0.6445	0.155	-5.446	-2.4285	3.7555	0.808	-0.612	1.505
R71	T2DM patients with DR	PPDR	noDME	female	Kazakh	1969	52	2009	40	12	64	164	23.8	14.6	0.104	117	12	no	yes	Brother	Insulin	21.4457	20.9403	22.4107	23.1523	27.619	26.117	22.9603	10.031	19.92	23.119	24.069	21.585	1.51467	2.02	0.549667	-0.192	-4.65867	-3.15667	3.04733	-0.15167	-1.102	1.38233
R72	T2DM patients with DR	NPDR	noDME	female	Kazakh	1949	72	2010	61	11	78	158	31.2	10.5		87	no	no	yes	Daughter	Insulin	21.9855	20.6415	23.1195	24.266	28.9765	26.6005	23.874	13.2585	20.6535	22.6365	24.241	22.1845	1.8885	3.2325	0.7545	-0.392	-5.1025	-2.7265	3.2205	1.2375	-0.367	1.6895
R73	T2DM patients with DR	NPDR	noDME	female	Kazakh	1960	61	1992	32	30	60	152	26	6.8	0.0984	103	no	no	yes	Mother, Sisters	Insulin	20.406	20.7997	22.2737	23.1437	27.3007	25.6867	22.7307	19.3523	20.134	23.187	23.802	21.451	2.32467	1.931	0.456999	-0.413	-4.57	-2.956	2.68233	-0.37033	-0.98567	1.36533
R74	T2DM patients with DR	NPDR	noDME	female	Kazakh	1969	52	2013	44	8	65	168	23	7.2			no	no	yes	Mother	Insulin	24.2785	22.1845	24.2645	26.062	30.387	28.482	25.4185	14.227	22.62	23.8805	25.6505	23.7325	1.14	3.234	1.154	-0.6435	-4.9685	-3.0635	2.7985	1.538	-0.232	1.686
R75	T2DM patients with DR	PPDR	noDME	female	Kazakh	1965	56	2014	49	7	87	155	36.2	10			no	on holidays	yes	Mother, Brother, Sister	Insulin	22.1725	21.8745	23.2225	25.7655	28.33	25.9045	23.077	16.838	20.8285	23.5125	24.6125	21.936	0.9045	1.2025	-0.1455	-2.6885	-5.253	-2.8275	2.2485	-0.4355	-1.5355	1.141
R76	T2DM patients with DR	NPDR	noDME	female	Kazakh	1962	59	1999	37	22	70	168	24.8	15		56	no	on holidays	yes	Mother, Brother	Insulin	20.6673	20.5487	22.2683	23.0107	26.811	25.778	23.1597	20.5723	20.295	23.044	23.979	21.921	2.49233	2.611	0.891333	0.149	-3.65133	-2.61833	2.92033	0.170666	-0.7645	1.29367
R77	T2DM patients with DR	PPDR	noDME	female	Uigur	1966	55	2018	52	3	74	163	27.9	7.2		53	no	no	yes	Mother, Brothers	Insulin	21.8765	21.2375	22.6155	24.7145	28.263	26.4715	23.4975	12.51	19.9185	23.5145	23.533	21.8175	1.621	2.26	0.882	-1.217	-4.7655	-2.974	3.579	-0.017	-0.0355	1.68
R78	T2DM patients with DR	PPDR	noDME	female	Kazakh	1971	50	2008	37	13	61	159	24.1	21	0.083	77	no	no	no		Insulin	20.3507	20.3593	22.0617	22.3217	27.0577	26.227	22.9353	20.265	18.897	23.141	23.974	21.038	2.58467	2.576	0.873665	0.613665	-4.12233	-3.29167	4.09167	-0.152	-0.985	1.95033
R79	T2DM patients with DR	PPDR	DME	female	Uzbek	1948	73	2015	67	6	68	168	24.1	15.2	0.09		no	no	no		Insulin	21.089	21.662	22.6515	24.858	28.108	25.537	22.736	15.375	21.0845	22.899	23.9395	21.8945	1.647	1.074	0.084499	-2.122	-5.372	-2.801	1.6515	-0.163	-1.2035	0.8415
R80	T2DM patients with DR	PPDR	noDME	male	Kazakh	1961	60	2005	44	16	102	172	34.5	6.6			no	no	yes	Mother	Insulin	21.57	20.255	21.48	23.646	26.5785	23.949	21.5425	13.829	19.8725	21.662	22.539	20.757	-0.0275	1.2875	0.062499	-2.1035	-5.036	-2.4065	1.67	-0.1195	-0.9965	0.7855
R81	T2DM patients with DR	PPDR	noDME	female	Kazakh	1950	71	2016	66	5	95	168	33.7	9.2			no	no	no		Insulin	20.031	18.8405	20.2325	21.0745	25.172	23.0645	19.4095	12.5365	16.5935	20.996	21.66	18.698	-0.6215	0.569	-0.823	-1.665	-5.7625	-3.655	2.816	-1.5865	-2.2505	0.7115
R82	T2DM patients with DR	NPDR	noDME	female	Kazakh	1960	61	2011	51	10	69	165	25.3	6.8			no	no	no		Insulin	21.7855	20.625	22.2035	23.255	27.5325	24.977	22.249	14.706	19.706	22.33	23.238	21.3685	0.4635	1.624	0.0455	-1.006	-5.2835	-2.728	2.543	-0.081	-0.989	0.8805
R83	T2DM patients with DR	PDR	DME	male	Kazakh	1958	63	2000	42	21	88	169	30.8	6.3			no	no	no		Insulin	22.0215	20.084	20.919	24.031	25.8745	23.5505	20.8535	16.897	20.3885	21.0235	21.9685	20.593	-1.168	0.769501	-0.0655	-3.1775	-5.021	-2.697	0.465	-0.17	-1.115	0.260501
R84	T2DM patients with DR	PPDR	noDME	male	Kazakh	1981	40	2001	20	20	75	170	26	8.9			no	no	yes	Mother, Brother	Insulin	21.7985	19.964	20.9935	23.374	26.0165	23.4665	21.0885	13.7225	19.958	21.117	22.2465	20.601	-0.71	1.1245	0.095	-2.2855	-4.928	-2.378	1.1305	-0.0285	-1.158	0.4875
R85	T2DM patients with DR	PPDR	noDME	male	Russian	1963	58	2007	44	13	80	175	26.1	9.6			no	no	no		Insulin	21.42	21.0385	22.3375	23.368	27.088	25.117	22.6285	12.5355	20.171	22.707	23.43	21.8865	1.2085	1.59	0.291	-0.7395	-4.4595	-2.4885	2.4575	-0.0785	-0.8015	0.742001
R86	T2DM patients with DR	NPDR	noDME	male	Uigur	1960	61	1999	39	22	98	175	32	15			no	no	no		Insulin	21.5775	20.1375	21.5265	22.744	26.3215	24.2065	21.0545	15.188	18.858	21.8075	22.6805	20.54	-0.523	0.916999	-0.472	-1.6895	-5.267	-3.152	2.1965	-0.753	-1.626	0.5145
R87	T2DM patients with DR	NPDR	noDME	female	Kazakh	1959	62	2002	43	19	68	159	23.8	6.8			no	no	yes	Mother	Insulin	20.265	18.994	20.853	21.1865	26.2665	23.2365	20.4905	12.661	17.0645	21.053	22.3255	19.213	0.2255	1.4965	-0.3625	-0.696	-5.776	-2.746	3.426	-0.5625	-1.835	1.2775
R88	T2DM patients with DR	PDR	DME	female	Kazakh	1967	54	2017	50	4	71	166	25.8	11.5			no	no	no		Insulin	21.572	21.538	22.9635	24.0995	28.3945	26.5855	23.628	16.3865	21.1915	23.694	24.4655	22.1185	2.056	2.09	0.6645	-0.4715	-4.7665	-2.9575	2.4365	-0.066	-0.8375	1.5095
R89	T2DM patients with DR	NPDR	noDME	male	Kazakh	1946	75	2015	69	6	68	165	25	9.5			no	no	no		Insulin	21.907	22.5725	23.6395	26.013	28.9795	27.418	24.6985	14.266	21.8965	24.2535	24.8365	22.7495	2.7915	2.126	1.059	-1.3145	-4.281	-2.7195	2.802	0.445001	-0.138	1.949
R90	T2DM patients with DR	PPDR	DME	male	Kazakh	1963	58	2019	56	2	92	186	26.6	6.3			20	on holidays	no		Linagliptin	22.5795	21.322	23.06	24.2145	28.687	26.5475	23.439	13.5725	20.281	23.057	24.074	21.462	0.8595	2.117	0.378999	-0.7755	-5.248	-3.1085	3.158	0.381999	-0.635	1.977
R91	T2DM patients with DR	NPDR	noDME	female	Russian	1949	72	2011	62	10	75	163	28.2	9.6			no	no	no		Insulin	22.2915	22.1215	23.734	25.0025	28.5225	26.8365	24.723	17.299	21.6435	23.423	24.9405	22.809	2.4315	2.6015	0.989	-0.2795	-3.7995	-2.1135	3.0795	1.3	-0.2175	1.914
R92	T2DM patients with DR	PPDR	noDME	female	Uigur	1970	51	2016	46	5	68	162	25.9	9.2			no	no	no		Insulin	22.756	22.5115	23.531	25.1425	29.3335	28.1255	24.5605	14.9265	21.6485	24.212	25.14	22.954	1.8045	2.049	1.0295	-0.582	-4.773	-3.565	2.912	0.3485	-0.5795	1.6065
R93	T2DM patients with DR	PPDR	noDME	female	Karakalpak	1978	43	2011	33	10	67	166	24.3	14			no	no	yes	Mother	Insulin	22.3545	21.577	22.5825	23.9265	27.621	25.827	22.728	15.43	19.779	23.3125	23.7715	21.547	0.3735	1.151	0.145499	-1.1985	-4.893	-3.099	2.949	-0.5845	-1.0435	1.181
R94	T2DM patients with DR	PDR	DME	male	Kazakh	1967	54	2010	43	11	102	176	32.9	10.2			no	on holidays	yes	Mother	Insulin	22.468	21.6075	22.523	24.0555	27.618	25.9385	23.017	10.1255	20.2675	22.9245	23.8705	21.9435	0.549	1.4095	0.494	-1.0385	-4.601	-2.9215	2.7495	0.092501	-0.8535	1.0735
R95	T2DM patients with DR	PDR	DME	male	Kazakh	1966	55	2002	36	19	70	165	27.5	7.8			no	no	no		Insulin	23.849	22.5485	23.8315	25.0785	29.685	27.494	24.497	15.554	21.14	24.191	25.4385	22.6995	0.648	1.9485	0.6655	-0.5815	-5.188	-2.997	3.357	0.306	-0.9415	1.7975
R96	T2DM patients with DR	PDR	DME	female	Russian	1948	73	2008	60	13	70	169	27.7	4.51	0.056	88	no	no	yes	Mother	Insulin	21.6605	20.694	21.9195	23.749	27.6575	25.69	23.4765	12.699	20.749	22.4285	23.265	22.14	1.816	2.7825	1.557	-0.2725	-4.181	-2.2135	2.7275	1.048	0.2115	1.3365
R97	T2DM patients with DR	NPDR	noDME	male	Kazakh	1946	75	2000	54	21	72	171	24.6	7.4			no	no	no		Insulin	23.1175	21.893	23.1595	25.2115	28.895	26.9625	24.005	16.171	21.647	23.222	24.4635	22.7215	0.8875	2.112	0.8455	-1.2065	-4.89	-2.9575	2.358	0.783	-0.4585	1.2835
R98	T2DM patients with DR	PDR	noDME	female	Russian	1936	85	2003	67	18	60	155	25	6.2		40	no	no	yes	Son	Insulin	22.325	20.632	22.2265	24.0355	26.645	24.954	22.277	15.853	19.8445	22.1345	23.24	21.4245	-0.048	1.645	0.0505	-1.7585	-4.368	-2.677	2.4325	0.142499	-0.963	0.8525
R99	T2DM patients with DR	PDR	DME	female	Kazakh	1961	60	2016	55	5	85	169	29.8	9.4		42	no	no	yes	Mother	Insulin	19.5857	19.231	20.7817	21.7503	25.1373	24.0267	20.7433	19.9037	18.067	21.335	22.566	19.673	1.15767	1.51233	-0.03833	-1.007	-4.394	-3.28333	2.779	-0.48933	-1.7205	1.17267
R100	T2DM patients with DR	PDR	DME	female	Kazakh	1968	53	2010	42	11	72	155	30	10.6		87	no	no	yes	Mother, Brother	Insulin	20.291	19.9607	21.395	22.9383	26.211	24.438	21.444	19.592	18.919	22.348	22.926	20.667	1.153	1.48333	0.049	-1.49433	-4.767	-2.994	2.63267	-0.79633	-1.37367	0.884666
D1	T2DM patients without DR	noDR		male	Kazakh	1966	55	2015	49	5	85	170	29.4	8	0.07		20	on holidays	no		Metformin	20.158	19.708	21.063	22.15	26.209	24.443	20.961	11.4935	17.8405	21.446	22.6365	19.573	0.802999	1.253	-0.102	-1.189	-5.248	-3.482	3.1205	-0.485	-1.6755	1.388
D2	T2DM patients without DR	noDR		female	Russian	1993	28	2016	23	4	63	152	27.2	14	0.24	84	no	no	no		Insulin	21.9255	21.6965	22.5785	24.325	28.6535	25.994	23.4045	15.034	21.2915	22.8715	24.0805	22.3515	1.479	1.708	0.825999	-0.9205	-5.249	-2.5895	2.113	0.533	-0.676	1.053
D3	T2DM patients without DR	noDR		male	Kazakh	1955	66	2020	65	1	74	170	25.6	8.1	0.14		20	no	no		Metformin	22.364	20.078	21.3175	22.8725	26.2795	23.8625	20.914	10.5615	18.399	22.0925	23.0095	20.0565	-1.45	0.835999	-0.4035	-1.9585	-5.3655	-2.9485	2.515	-1.1785	-2.0955	0.857499
D4	T2DM patients without DR	noDR		female	Azerbaijani	1954	67	2010	56	10	65	155	27	18			no	no	no		Insulin	21.741	21.1395	22.6505	23.96	28.2675	25.624	23.219	9.9095	20.1785	22.4935	24.1345	21.813	1.478	2.0795	0.568501	-0.741	-5.0485	-2.405	3.0405	0.725501	-0.9155	1.406
D5	T2DM patients without DR	noDR		male	Kazakh	1960	61	2015	55	5	69	170	23.8	12			no	no	yes	Brother	Metformin	23.6955	22.6535	23.7425	25.9355	29.649	27.1635	24.818	10.8205	22.303	24.0325	25.042	23.6075	1.1225	2.1645	1.0755	-1.1175	-4.831	-2.3455	2.515	0.785501	-0.224	1.2105
D6	T2DM patients without DR	noDR		male	Kazakh	1956	65	2001	45	19	75	170	25.9	8.5	0.2		no	no	yes	Brother	Insulin	23.065	21.58	23.217	25.393	28.728	26.8675	24.337	10.4445	22.523	23.613	24.794	23.108	1.272	2.757	1.12	-1.056	-4.391	-2.5305	1.814	0.724	-0.457	1.229
D7	T2DM patients without DR	noDR		male	Uigur	1954	67	2010	56	10	70	172	23.6	11.4			no	no	no		Insulin	22.1035	21.8425	22.946	23.965	28.394	26.3905	22.801	9.918	20.067	23.712	24.3135	22.2255	0.697501	0.958501	-0.145	-1.164	-5.593	-3.5895	2.734	-0.911	-1.5125	0.5755
D8	T2DM patients without DR	noDR		male	Uigur	1970	51	2014	44	6	88	182	26.5	12	0.1		no	no	yes	Sister	Insulin	21.4235	21.437	22.629	24.1795	28.0465	25.956	22.945	9.8525	20.45	22.7075	23.8885	22.002	1.5215	1.508	0.316	-1.2345	-5.1015	-3.011	2.495	0.2375	-0.9435	0.943
D9	T2DM patients without DR	noDR		male	Uigur	1958	63	2018	60	2	74	166	26.8	10.2	0.195		no	no	no		Metformin	28.311	27.9325	28.6075	30.1655	33.6765	33.1135	28.74	15.575	26.442	28.9415	30.0305	26.8435	0.429	0.8075	0.1325	-1.4255	-4.9365	-4.3735	2.298	-0.2015	-1.2905	1.8965
D10	T2DM patients without DR	noDR		female	Kazakh	1961	60	2011	50	9	63	159	24.9	5.6	0.185	103	no	no	no		Metformin	21.0247	19.5847	21.292	22.0173	26.1637	24.8393	21.8683	18.6403	18.882	21.92	23.015	20.393	0.843667	2.28367	0.576334	-0.149	-4.29533	-2.971	2.873	-0.16467	-1.26	1.362
D11	T2DM patients without DR	noDR		male	Kazakh	1979	42	2008	29	12	85	172	28.7	8.9	0.143	107	no	no	no		does not take	19.284	19.6513	21.1297	21.9417	25.608	24.4127	21.3823	18.324	19.532	22.075	22.873	20.411	2.09833	1.731	0.252666	-0.55933	-4.22567	-3.03033	1.88133	-0.662	-1.45933	1.00267
D12	T2DM patients without DR	noDR		female	Azerbaijani	1972	49	2018	46	2	125	160	48.8	12			no	no	yes	Mother	does not take	22.9295	22.361	23.6165	24.9575	29.181	28.018	24.6185	10.614	21.7425	23.9475	25.258	23.2745	1.689	2.2575	1.002	-0.339	-4.5625	-3.3995	2.876	0.671	-0.6395	1.344
D13	T2DM patients without DR	noDR		female	Kazakh	1968	53	1998	30	22	70	170	24.22	12	0.187		no	no	yes	Mother, Sister	Metformin	22.566	22.1825	23.484	25.4655	29.007	26.774	23.7555	9.8545	21.298	23.533	24.492	22.733	1.1895	1.573	0.2715	-1.71	-5.2515	-3.0185	2.4575	0.2225	-0.7365	1.0225
D14	T2DM patients without DR	noDR		male	Korean	1939	82	2015	76	5	67	166	24.3	5.8		68	no	no	no		Metformin	23.1225	23.442	24.378	26.067	28.7245	27.6955	25.6445	12.6925	22.6405	24.1535	25.7015	24.599	2.522	2.2025	1.2665	-0.4225	-3.08	-2.051	3.004	1.491	-0.057	1.0455
D15	T2DM patients without DR	noDR		female	Kazakh	1970	51	2010	40	10	82	158	32.8	10			no	no	yes	Brother	Insulin	22.474	21.634	22.744	25.3205	27.702	26.2595	23.373	10.6885	21.615	22.935	24.328	22.5835	0.899	1.739	0.629	-1.9475	-4.329	-2.8865	1.758	0.438	-0.955	0.7895
D16	T2DM patients without DR	noDR		female	Kazakh	1964	57	2002	38	18	101	184	29.8	9.5			no	no	no		Insulin	22.6205	22.413	23.692	25.797	28.169	26.5405	24.072	11.0685	22.317	23.6695	25.738	23.893	1.4515	1.659	0.38	-1.725	-4.097	-2.4685	1.755	0.4025	-1.666	0.178999
D17	T2DM patients without DR	noDR		male	Uigur	1979	42	2020	41	0.08	60	172	20.2	14	0.14	113	10	no	no		Insulin	21.442	19.8405	21.006	22.665	26.444	24.0595	21.2785	9.933	18.3625	21.8025	22.7225	20.2625	-0.1635	1.438	0.272501	-1.3865	-5.1655	-2.781	2.916	-0.524	-1.444	1.016
D18	T2DM patients without DR	noDR		female	Kazakh	1968	53	2020	52	0.42	50	160	19.5	14	0.296	73	no	no	no		Insulin	23.319	22.1455	23.3765	25.53	28.539	26.6045	23.8075	10.6255	21.186	23.362	24.6935	22.681	0.4885	1.662	0.431001	-1.7225	-4.7315	-2.797	2.6215	0.4455	-0.886	1.1265
D19	T2DM patients without DR	noDR		female	Kazakh	1953	68	2020	67	0.08	95	162	36.1	12.4			no	no	no		Metformin	21.151	20.9345	20.535	22.779	26.459	23.878	20.8695	10.1245	19.5395	22.107	22.789	21.0205	-0.2815	-0.065	0.334499	-1.9095	-5.5895	-3.0085	1.33	-1.2375	-1.9195	-0.151
D20	T2DM patients without DR	noDR		female	Kazakh	1957	64	2015	58	5	57	160	22.2	7.1	0.296		no	no	no		Metformin	21.592	20.9495	22.269	23.523	27.7055	25.603	22.036	10.739	19.622	23.0075	23.952	21.225	0.444	1.0865	-0.233	-1.487	-5.6695	-3.567	2.414	-0.9715	-1.916	0.811
D21	T2DM patients without DR	noDR		male	Kazakh	1966	55	2013	47	7	70	162	26.6	8.6	0.203		no	no	no		Insulin	21.0175	22.21	23.1465	24.4625	28.061	25.9725	23.3005	10.7595	21.0985	23.1845	24.693	22.396	2.283	1.0905	0.154	-1.162	-4.7605	-2.672	2.202	0.115999	-1.3925	0.9045
D22	T2DM patients without DR	noDR		female	Kazakh	1960	61	2017	57	3	46	156	18.9	10.2	0.113		no	no	no		Metformin	21.331	21.365	22.54	23.83	27.5725	25.963	22.819	9.7925	20.5845	22.6335	23.9195	21.998	1.488	1.454	0.279	-1.011	-4.7535	-3.144	2.2345	0.1855	-1.1005	0.821
D23	T2DM patients without DR	noDR		female	Kazakh	1961	60	2010	49	10	65	160	25.3	6.7	0.084	77	no	no	yes	Brother	Insulin	19.767	20.3613	21.3963	22.457	25.8673	24.81	21.597	18.515	19.242	22.023	23.365	20.335	1.83	1.23567	0.200667	-0.86	-4.27033	-3.213	2.33067	-0.45	-1.792	1.23833
D24	T2DM patients without DR	noDR		female	Kazakh	1970	51	2019	49	1	68	170	23.5	5.6	0.201		no	no	yes	Father	Insulin	21.945	21.4375	22.8415	23.9635	27.9255	26.121	22.876	10.3355	19.886	23.127	24.4625	21.7385	0.931	1.4385	0.034501	-1.0875	-5.0495	-3.245	2.99	-0.251	-1.5865	1.1375
D25	T2DM patients without DR	noDR		male	Uigur	1955	66	2015	60	5	91	181	27.7	8.3		98	no	no	yes	Mother, Brother	Glibenclamide	22.5205	21.791	23.0795	24.4695	28.775	26.1425	23.5125	10.402	21.1045	23.2895	24.244	22.6535	0.992	1.7215	0.433001	-0.957	-5.2625	-2.63	2.408	0.223	-0.7315	0.859
D26	T2DM patients without DR	noDR		male	Kazakh	1967	54	2018	51	2	74	167	26.5	10.2			5	on holidays	no		Metformin	19.933	19.6995	21.5635	22.271	25.8905	23.8045	20.496	10.769	17.5895	21.6315	23.1925	19.3385	0.563	0.796499	-1.0675	-1.775	-5.3945	-3.3085	2.9065	-1.1355	-2.6965	1.1575
D27	T2DM patients without DR	noDR		male	Kazakh	1975	46	2020	45	0.08	110	165	40.4	12.7			15	no	no		does not take	22.2145	21.7145	24.3995	26.75	30.983	25.977	24.6305	11.258	21.3085	23.9345	23.6015	23.2065	2.416	2.916	0.231	-2.1195	-6.3525	-1.3465	3.322	0.696	1.029	1.424
D28	T2DM patients without DR	noDR		male	Kazakh	1972	49	2020	48	0.08	85	188	24	12.4			3	no	no		Metformin	24.384	22.8345	23.27	25.5835	28.4355	26.091	23.6375	11.535	22.014	23.4	24.633	23.0905	-0.7465	0.802999	0.3675	-1.946	-4.798	-2.4535	1.6235	0.237499	-0.9955	0.547
D29	T2DM patients without DR	noDR		male	Kazakh	1954	67	2011	57	9	83	183	24.7	9.2			no	no	no		Metformin	23.6185	23.423	24.004	27.1175	28.5565	26.117	24.388	11.3265	23.0435	23.6395	25.7115	23.646	0.769499	0.964999	0.384	-2.7295	-4.1685	-1.729	1.3445	0.7485	-1.3235	0.742
D30	T2DM patients without DR	noDR		male	Russian	1986	35	2018	32	2	104	175	33.9	14		108	no	no	yes	Mother, Father	Insulin	22.364	22.8985	24.3235	25.4265	28.224	26.4425	24.1925	11.0835	21.3885	24.019	26.1945	23.054	1.8285	1.294	-0.131	-1.234	-4.0315	-2.25	2.804	0.1735	-2.002	1.1385
D31	T2DM patients without DR	noDR		female	Kazakh	1961	60	2012	51	8	83	168	29.4	13	0.203		no	no	yes	Sister	Insulin	22.745	22.3115	23.8825	25.378	28.454	26.9285	24.8685	10.8105	21.7755	23.6585	26.008	23.3765	2.1235	2.557	0.986	-0.5095	-3.5855	-2.06	3.093	1.21	-1.1395	1.492
D32	T2DM patients without DR	noDR		female	Kazakh	1973	48	2012	39	8	73	160	28.5	7.5	0.1	99	no	no	no		Insulin	19.834	19.6617	21.1543	22.157	25.9813	24.6553	20.6843	17.9253	17.956	22.379	23.066	19.687	0.850333	1.02267	-0.47	-1.47267	-5.297	-3.971	2.61033	-1.81267	-2.50033	0.879
D33	T2DM patients without DR	noDR		male	Kazakh	1955	66	2010	55	10	65	170	22.4	12.5			10	no	no		Insulin	23.904	23.516	24.7295	26.408	28.906	26.442	24.536	12.68	22.654	24.4135	25.746	23.5395	0.632	1.02	-0.1935	-1.872	-4.37	-1.906	1.882	0.122499	-1.21	0.9965
D34	T2DM patients without DR	noDR		female	Russian	1947	74	2005	58	15	67	156	27.5	6.9			no	no	yes	Mother, Brother	Metformin	22.6065	22.379	23.661	25.336	27.6755	26.0805	24.0185	11.9575	21.252	23.7815	25.024	23.2385	1.412	1.6395	0.3575	-1.3175	-3.657	-2.062	2.7665	0.237	-1.0055	0.780001
D35	T2DM patients without DR	noDR		male	Kazakh	1970	51	2018	48	2	52	162	19.8	20.2		52	20	on holidays	yes	Sister	Metformin	23.4375	21.251	21.761	24.559	28.105	25.5575	23.619	10.835	21.571	21.978	23.2095	22.658	0.1815	2.368	1.858	-0.94	-4.486	-1.9385	2.048	1.641	0.4095	0.961
D36	T2DM patients without DR	noDR		female	Uigur	1963	58	2018	55	2	61	155	25.3	15.3			no	no	yes	Mother	Metformin	24.395	23.1265	24.171	26.873	28.655	26.9395	24.7405	12.6265	23.802	23.9425	25.523	24.377	0.345499	1.614	0.5695	-2.1325	-3.9145	-2.199	0.938499	0.797999	-0.7825	0.363499
D37	T2DM patients without DR	noDR		female	Kazakh	1954	67	2020	66	0.17	55	170	19	5.6			no	no	no		does not take	24.415	21.7025	22.858	25.6165	28.298	25.3525	23.33	11.1835	21.813	22.9225	24.1305	22.523	-1.085	1.6275	0.471999	-2.2865	-4.968	-2.0225	1.517	0.4075	-0.8005	0.807
D38	T2DM patients without DR	noDR		male	Kazakh	1970	51	2018	48	2	45	165	16.5	5.8			no	no	yes	Mother	Insulin	24.7125	25.09	25.8655	28.606	30.8345	28.786	27.1815	12.871	24.9845	25.341	27.067	25.4245	2.469	2.0915	1.316	-1.4245	-3.653	-1.6045	2.197	1.8405	0.1145	1.757
D39	T2DM patients without DR	noDR		male	Kazakh	1956	65	2015	59	5	89	165	32.6	12.5	0.082		no	no	no		Insulin	25.768	25.8635	26.6845	28.738	31.068	29.511	27.301	13.5305	25.5445	25.5165	27.3955	26.268	1.533	1.4375	0.616499	-1.437	-3.767	-2.21	1.7565	1.7845	-0.0945	1.033
D40	T2DM patients without DR	noDR		male	Uigur	1939	82	2015	76	5	83	170	28.7	10.2	0.091		no	no	no		Metformin	22.7975	22.8035	23.614	25.9025	29.253	26.9045	24.573	10.819	22.3285	23.469	25.3625	22.9915	1.7755	1.7695	0.959001	-1.3295	-4.68	-2.3315	2.2445	1.104	-0.7895	1.5815
D41	T2DM patients without DR	noDR		female	Kazakh	1969	52	2009	40	11	102	156	41.9	10.2	0.119		no	no	no		Metformin	22.057	21.9295	23.455	24.26	29.2545	26.4365	23.2135	11.2975	20.171	23.901	25.23	22.0005	1.1565	1.284	-0.2415	-1.0465	-6.041	-3.223	3.0425	-0.6875	-2.0165	1.213
D42	T2DM patients without DR	noDR		male	Kazakh	1951	70	2005	54	15	68	170	23.5	12	0.163	87	no	no	yes	Mother	does not take	22.063	21.6493	22.5983	23.423	27.255	26.016	23.037	18.3	20.417	23.224	24.461	21.759	0.974	1.38767	0.438667	-0.386	-4.218	-2.979	2.52533	-0.28167	-1.51867	1.18383
D43	T2DM patients without DR	noDR		female	Kazakh	1945	76	2020	75	0.17	67	163	25.2	6.3	0.09		no	no	no		does not take	21.223	20.482	21.536	23.036	26.319	24.365	22.12	13.68	19.7785	21.7165	22.808	21.563	0.896999	1.638	0.584	-0.916	-4.199	-2.245	2.3415	0.403501	-0.688	0.557
D44	T2DM patients without DR	noDR		male	Kazakh	1956	65	2010	54	10	84	163	31.62	8.4	0.0729		no	on holidays	yes	Sister	Metformin	22.556	21.7715	23.034	23.8965	28.7605	26.1155	23.7195	13.3695	20.438	23.481	24.4015	22.296	1.1635	1.948	0.685501	-0.177	-5.041	-2.396	3.2815	0.238501	-0.682	1.4235
D45	T2DM patients without DR	noDR		male	Kazakh	1968	53	2020	52	0.17	76	165	27.92	9.6	0.0801	102	10	on holidays	no		Metformin	21.4995	21.815	23.2335	24.2505	28.7065	26.479	24.0465	16.8055	20.6555	23.488	24.712	22.391	2.547	2.2315	0.813001	-0.204	-4.66	-2.4325	3.391	0.5585	-0.6655	1.6555
D46	T2DM patients without DR	noDR		male	Kazakh	1963	58	2013	50	7	63	172	21.3	9		107	20	on holidays	no		Insulin	22.8565	21.982	23.47	24.6545	29.563	27.2585	24.2855	15.646	20.8165	23.8815	24.702	22.722	1.429	2.3035	0.8155	-0.369	-5.2775	-2.973	3.469	0.404	-0.4165	1.5635
D47	T2DM patients without DR	noDR		female	Kazakh	1960	61	2002	42	18	80	165	29.38	10.2		69	no	no	no		Insulin	25.388	24.7555	27.059	27.282	30.277	28.697	27.533	15.3975	23.7745	26.078	28.8625	25.8865	2.145	2.7775	0.474	0.250999	-2.744	-1.164	3.7585	1.455	-1.3295	1.6465
D48	T2DM patients without DR	noDR		female	Uigur	1964	57	2016	52	4	90	162	34.29	4.2	0.066	97	no	no	yes	Mother, Sister	Canagliflozin, Liraglutide	24.8355	24.3305	25.99	27.062	31.039	28.8875	26.039	17.923	22.779	25.5295	27.318	24.316	1.2035	1.7085	0.049	-1.023	-5	-2.8485	3.26	0.5095	-1.279	1.723
D49	T2DM patients without DR	noDR		female	Uigur	1970	51	2009	39	11	75	162	28.58	9.6		75	5	on holidays	no		Insulin	22.7585	21.3405	23.364	24.456	28.52	26.7595	23.9775	17.641	20.155	22.892	24.51	22.0525	1.219	2.637	0.613501	-0.4785	-4.5425	-2.782	3.8225	1.0855	-0.5325	1.925
D50	T2DM patients without DR	noDR		female	Kazakh	1959	62	2018	59	2	65	168	23.03	12.3		50	no	no	no		Insulin	22.577	22.3905	23.725	25.1125	29.019	26.6005	24.565	15.91	21.8445	23.5055	24.9455	23.273	1.988	2.1745	0.839999	-0.5475	-4.454	-2.0355	2.7205	1.0595	-0.3805	1.292
D51	T2DM patients without DR	noDR		female	Kazakh	1964	57	2012	48	8	85	157	34.48	7.9	0.0863	54	no	on holidays	yes	Father	Metformin	21.6183	21.613	23.1917	24.2297	28.0663	27.0315	24.1493	18.836	21.75	24.36	24.981	22.913	2.531	2.53633	0.957666	-0.08033	-3.917	-2.88217	2.47733	-0.13233	-0.753	1.31467
D52	T2DM patients without DR	noDR		male	Kazakh	1956	65	2009	53	11	85	175	27.76	6.2	0.07		20	no	no		Gliclazide	22.2785	21.085	22.4485	23.363	27.419	25.751	22.492	14.5645	19.395	22.975	24.5345	21.224	0.2135	1.407	0.0435	-0.871	-4.927	-3.259	3.097	-0.483	-2.0425	1.268
D53	T2DM patients without DR	noDR		female	Kazakh	1967	54	2009	42	11	90	165	33.06	11.9		72	no	no	yes	Mother	Insulin	22.451	21.364	23.394	24.4765	27.7375	25.9265	23.178	14.4955	19.2855	23.251	25.539	22.175	0.727	1.814	-0.216	-1.2985	-4.5595	-2.7485	3.8925	-0.073	-2.361	1.003
D54	T2DM patients without DR	noDR		male	Kazakh	1976	45	2018	42	2	72	170	24.91	6.9	0.115	107	20	on holidays	no		Metformin	22.4065	22.1885	23.414	25.402	29.1375	26.9345	24.5595	14.005	22.607	23.2435	24.884	23.388	2.153	2.371	1.1455	-0.8425	-4.578	-2.375	1.9525	1.316	-0.3245	1.1715
D55	T2DM patients without DR	noDR		female	Kazakh	1957	64	2003	46	17	57	157	23.12	15			no	no	yes	Mother	Insulin	22.603	21.5695	23.3275	23.9315	27.8665	26.1805	23.5345	15.023	19.365	23.108	25.0275	22.0595	0.9315	1.965	0.207	-0.397	-4.332	-2.646	4.1695	0.4265	-1.493	1.475
D56	T2DM patients without DR	noDR		female	Russian	1975	46	2013	38	7	53.5	162	20.2	8.4		75	no	no	yes	Brother	Insulin	23.011	21.283	23.305	23.2975	27.4005	25.263	22.4495	11.1385	18.6045	23.6055	25.3395	21.4025	-0.5615	1.1665	-0.8555	-0.848	-4.951	-2.8135	3.845	-1.156	-2.89	1.047
D57	T2DM patients without DR	noDR		female	Russian	1958	63	2019	61	1	87	163	32.74	14.4	0.105	98	10	on holidays	yes	Mother	Metformin	22.142	21.116	22.4005	22.987	27.116	24.5805	21.856	11.126	18.3285	23.2945	24.8365	20.763	-0.286	0.74	-0.5445	-1.131	-5.26	-2.7245	3.5275	-1.4385	-2.9805	1.093
D58	T2DM patients without DR	noDR		male	Kazakh	1963	58	2000	37	20	80	175	26.12	7.5	0.129	69	no	no	yes	Brother	Metformin	21.3033	21.226	22.1613	23.812	26.682	25.9067	22.9253	17.9883	20.926	22.532	23.902	21.721	1.622	1.69933	0.764	-0.88667	-3.75667	-2.98133	1.918	0.312	-1.05833	1.12267
D59	T2DM patients without DR	noDR		female	Kazakh	1960	61	2009	49	11	70	158	30.04	8.1	0.0777	72	no	no	yes	Mother, Sister	Metformin	20.3833	21.1687	22.2077	23.3757	27.0577	25.9495	23.4493	17.85	21.448	23.489	24.198	22.402	3.066	2.28067	1.24167	0.073667	-3.60833	-2.50017	2.189	0.148001	-0.56167	1.23467
D60	T2DM patients without DR	noDR		female	Kazakh	1966	55	2017	51	3	70	155	29.14	9		95	no	no	no		Insulin	24.3555	24.363	25.952	27.335	31.783	28.299	27.2285	12.6065	24.4515	25.2175	26.7635	25.6275	2.873	2.8655	1.2765	-0.1065	-4.5545	-1.0705	2.777	2.011	0.464999	1.601
D61	T2DM patients without DR	noDR		male	Kazakh	1963	58	2008	45	12	120	170	41.52	18		111	20	no	no		Gliclazide	23.4	23.4435	25.082	26.035	30.279	28.8075	26.612	11.5665	22.7975	24.923	26.8705	24.997	3.212	3.1685	1.53	0.577001	-3.667	-2.1955	3.8145	1.689	-0.2585	1.615
D62	T2DM patients without DR	noDR		male	Kazakh	1973	48	2003	30	17	72	165	26.45	10.1		67	20	on holidays	no		Metformin	25.402	24.8065	26.784	27.176	31.5605	29.5815	28.8415	11.949	24.667	26.404	28.9835	26.745	3.4395	4.035	2.0575	1.6655	-2.719	-0.74	4.1745	2.4375	-0.142	2.0965
D63	T2DM patients without DR	noDR		male	Kazakh	1954	67	1999	45	21	80	180	24.69	6.9	0.0727	70	no	no	no		Metformin	20.8017	20.057	22.002	22.201	26.5677	25.2823	22.2967	17.7607	18.319	22.452	23.629	20.486	1.495	2.23967	0.294666	0.095667	-4.271	-2.98567	4.024	-0.10867	-1.286	1.8575
D64	T2DM patients without DR	noDR		male	Kazakh	1961	60	2010	49	10	85	170	29.41	6.7	0.1034	35	no	no	yes	Sister	Insulin	20.8337	20.887	22.3997	22.8993	27.4347	25.708	23.345	17.5553	19.292	22.792	23.6	20.727	2.51133	2.458	0.945333	0.445665	-4.08967	-2.363	3.371	-0.12867	-0.93633	1.93583
D65	T2DM patients without DR	noDR		male	Kazakh	1966	55	2015	49	5	96	170	33.22	11	0.1203	91	no	no	yes	Mother	Metformin	20.2007	20.3703	21.9187	22.1307	26.6087	25.5343	22.5933	17.2693	20.231	23.19	23.935	21.619	2.39267	2.223	0.674667	0.462667	-4.01533	-2.941	3.13	0.171333	-0.574	1.74167
D66	T2DM patients without DR	noDR		male	Kazakh	1972	49	2019	47	1	96	175	31.35	7.9	0.068	105	no	no	yes	Mother, Brother	Metformin, Canagliflozin	22.788	22.5285	23.44	25.028	29.4455	26.8055	24.154	10.7205	20.881	24.0295	25.3345	22.62	1.366	1.6255	0.714001	-0.874	-5.2915	-2.6515	3.273	0.1245	-1.1805	1.534
D67	T2DM patients without DR	noDR		male	Chinese	1957	64	2010	53	10	65	172	21.97	11.2		66	5	on holidays	no		Insulin	23.996	23.88	25.032	26.0955	32.8285	28.6165	26.5315	12.134	23.2845	25.1085	26.3295	24.781	2.5355	2.6515	1.4995	0.436	-6.297	-2.085	3.247	1.423	0.202	1.7505
D68	T2DM patients without DR	noDR		male	Kazakh	1979	42	2007	28	13	108	189	30.23	9.2		114	no	no	no		Insulin	21.11	21.1305	22.7135	23.203	28.7425	25.6205	22.783	10.504	18.852	22.8805	24.515	21.0235	1.673	1.6525	0.0695	-0.42	-5.9595	-2.8375	3.931	-0.0975	-1.732	1.7595
D69	T2DM patients without DR	noDR		female	Kazakh	1948	73	2010	62	10	71	150	31.56	8.2		84	no	no	yes	Mother	Insulin	22.6335	22.782	23.777	25.41	29.423	27.7675	25.399	10.8715	22.481	23.8345	25.1325	23.6405	2.7655	2.617	1.622	-0.011	-4.024	-2.3685	2.918	1.5645	0.2665	1.7585
D70	T2DM patients without DR	noDR		female	Kurd	1958	63	2009	51	11	67	168	23.74	10		116	no	no	yes	Sister	Insulin	24.463	22.6415	24.8155	26.078	30.1175	26.666	26.034	12.439	23.239	23.433	26.3705	24.6975	1.571	3.3925	1.2185	-0.044	-4.0835	-0.632	2.795	2.601	-0.3365	1.3365
D71	T2DM patients without DR	noDR		female	Kazakh	1958	63	1985	27	35	73	164	27.14	7	0.0938	82	no	no	yes	Son, Daughter	Insulin	19.9493	19.2157	21.3007	21.301	26.2597	24.4495	21.8027	17.1537	17.784	21.996	23.208	20.297	1.85333	2.587	0.502	0.501668	-4.457	-2.64683	4.20733	-0.00533	-1.21733	1.69367
D72	T2DM patients without DR	noDR		female	Kurd	1965	56	2013	48	7	79	150	35.11	20	0.1157	83	no	no	yes	Sister	Insulin	22.296	21.568	23.028	24.407	28.422	25.8655	23.631	10.7165	21.4215	22.814	24.4035	22.6665	1.335	2.063	0.603	-0.776	-4.791	-2.2345	2.2095	0.816999	-0.7725	0.964499
D73	T2DM patients without DR	noDR		female	Kazakh	1957	64	2012	55	8	81	167	29.04	8.4		101	no	no	yes	Mother	Metformin, Canagliflozin	22.3335	22.2465	23.7255	24.95	29.5185	26.949	24.9245	11.102	22.4585	23.727	25.545	23.7905	2.591	2.678	1.199	-0.0255	-4.594	-2.0245	2.466	1.1975	-0.6205	1.134
D74	T2DM patients without DR	noDR		female	Kazakh	1956	65	2016	60	4	70	157	28.4	7.1		80	no	no	no		Insulin	24.2325	22.776	24.3115	25.432	29.243	26.4395	24.775	11.348	21.462	24.0495	26.1065	23.406	0.5425	1.999	0.463501	-0.657	-4.468	-1.6645	3.313	0.7255	-1.3315	1.369
D75	T2DM patients without DR	noDR		female	Kazakh	1963	58	2001	38	16	81	156	33.28	9.5		50	no	no	no		Insulin	22.3195	22.1235	23.385	25.0175	28.553	26.9705	24.6075	10.3745	22.1145	23.3535	24.832	23.41	2.288	2.484	1.2225	-0.41	-3.9455	-2.363	2.493	1.254	-0.2245	1.1975
D76	T2DM patients without DR	noDR		female	Kazakh	1958	63	2007	49	13	98	153	39.26	11.1			no	no	yes	Father, Brother	Gliclazide	21.4655	21.7835	22.835	23.909	27.564	25.653	22.9525	11.047	20.2595	22.873	24.568	21.8995	1.487	1.169	0.117499	-0.9565	-4.6115	-2.7005	2.693	0.0795	-1.6155	1.053
D77	T2DM patients without DR	noDR		male	Kazakh	1961	60	2016	55	6	75	175	24.49	8	0.064		20	no	no		Metformin	23.8945	21.828	22.766	24.6035	28.321	25.498	23.4345	10.95	20.706	23.184	24.3435	22.5885	-0.46	1.6065	0.668499	-1.169	-4.8865	-2.0635	2.7285	0.2505	-0.909	0.846
D78	T2DM patients without DR	noDR		female	Uigur	1952	69	2005	53	15	80	164	29.74	8.3		75	no	no	no		Metformin, Canagliflozin	22.618	20.668	21.686	23.3645	26.5395	24.465	21.741	10.4215	19.353	21.9115	23.518	21.043	-0.877	1.073	0.054999	-1.6235	-4.7985	-2.724	2.388	-0.1705	-1.777	0.698
D79	T2DM patients without DR	noDR		female	Uigur	1947	74	2010	63	10	64	158	25.64	7.5		72	no	no	no		Insulin	21.399	21.948	23.154	24.5785	28.138	25.494	24.03	11.3295	21.3095	22.792	24.318	23.054	2.631	2.082	0.876	-0.5485	-4.108	-1.464	2.7205	1.238	-0.288	0.976001
D80	T2DM patients without DR	noDR		female	Russian	1946	75	2003	57	17	88	150	39.11	8	0.1041	84	no	no	yes	Sister	Insulin	24.651	23.3865	26.138	27.0515	30.4	28.4885	26.787	12.6895	23.223	24.7615	27.084	24.944	2.136	3.4005	0.649	-0.2645	-3.613	-1.7015	3.564	2.0255	-0.297	1.843
D81	T2DM patients without DR	noDR		female	Uigur	1968	53	2020	52	0.83	78	158	31.24	7.5	0.14	88	no	no	no		Insulin	22.709	21.789	23.712	24.062	29.0095	26.1055	23.3825	10.82	19.6275	23.443	25.102	22.2935	0.673501	1.5935	-0.3295	-0.6795	-5.627	-2.723	3.755	-0.0605	-1.7195	1.089
D82	T2DM patients without DR	noDR		female	Russian	1954	67	1989	35	26	94	168	33.3	16		75	no	no	no		Insulin	23.1335	22.6525	24.5355	25.652	29.4325	27.286	25.4155	11.2645	21.6045	24.1585	25.5435	23.7645	2.282	2.763	0.879999	-0.2365	-4.017	-1.8705	3.811	1.257	-0.128	1.651
D83	T2DM patients without DR	noDR		female	Kazakh	1948	73	2000	52	20	95	160	37.11	11		72	no	no	yes	Mother	Insulin	22.559	22.1725	23.3155	25.267	28.4935	25.9	23.8195	10.709	21.687	23.0955	24.674	22.649	1.2605	1.647	0.504	-1.4475	-4.674	-2.0805	2.1325	0.724	-0.8545	1.1705
D84	T2DM patients without DR	noDR		female	Russian	1960	61	2015	55	5	87	159	34.41	16			no	no	yes	Mother	Metformin, Canagliflozin	23.563	22.6815	24.1955	25.6435	29.3435	27.258	24.407	11.0815	21.669	23.6455	25.281	23.113	0.844001	1.7255	0.2115	-1.2365	-4.9365	-2.851	2.738	0.761501	-0.874	1.294
D85	T2DM patients without DR	noDR		male	Kazakh	1948	73	2020	72	0.25	81	165	29.75	6.8		74	no	no	no		Metformin	21.418	21.3575	22.999	23.8585	27.8795	25.414	23.284	10.2745	19.791	22.8155	25.025	21.862	1.866	1.9265	0.285	-0.5745	-4.5955	-2.13	3.493	0.468501	-1.741	1.422
D86	T2DM patients without DR	noDR		female	Kazakh	1965	56	2015	50	5	68	160	26.56	8	0.0803	100	no	no	no		Insulin	22.9695	22.253	23.9525	24.972	28.4075	26.305	24.455	10.7655	21.248	23.476	25.4035	22.9925	1.4855	2.202	0.502501	-0.517	-3.9525	-1.85	3.207	0.979	-0.9485	1.4625
D87	T2DM patients without DR	noDR		female	Kazakh	1968	53	2020	52	0.83	65	168	23.03	7.1	0.0571	60	3	on holidays	yes	Mother	Metformin	21.9545	21.6885	23.385	24.145	28.122	25.61	22.9975	10.635	19.7805	22.604	24.7545	21.737	1.043	1.309	-0.3875	-1.1475	-5.1245	-2.6125	3.217	0.3935	-1.757	1.2605
D88	T2DM patients without DR	noDR		female	Kazakh	1966	55	2017	51	3	55	156	22.6	9.1			8	on holidays	no		Metformin	20.4595	20.982	22.008	23.362	26.685	24.6225	22.391	10.3995	20.1845	21.7075	23.363	21.4675	1.9315	1.409	0.383	-0.971	-4.294	-2.2315	2.2065	0.683499	-0.972	0.923499
D89	T2DM patients without DR	noDR		male	Kazakh	1956	65	2017	61	3	94	174	31.05	6.8	0.105		no	no	no		Gliclazide	23.082	22.404	23.7115	24.937	29.3485	26.4655	23.9635	10.6685	20.943	23.186	24.668	22.5135	0.881499	1.5595	0.252	-0.9735	-5.385	-2.502	3.0205	0.7775	-0.7045	1.45
D90	T2DM patients without DR	noDR		male	Korean	1943	78	2003	60	17	65	168	23.03	6.2			no	no	yes	Mother	Insulin	24.104	22.95	24.4085	25.658	28.032	26.4725	24.057	13.5095	21.206	23.6075	25.1525	23.645	-0.047	1.107	-0.3515	-1.601	-3.975	-2.4155	2.851	0.4495	-1.0955	0.412
D91	T2DM patients without DR	noDR		male	Kazakh	1951	70	2008	57	13	75	168	26.57	5.8	0.0932	88	no	no	no		Insulin	21.393	21.1033	22.3737	22.9643	27.3023	26.1703	23.1903	18.9973	19.772	23.216	23.979	21.636	1.79733	2.087	0.816666	0.226	-4.112	-2.98	3.53033	0.086	-0.6765	1.666
D92	T2DM patients without DR	noDR		female	Uigur	1970	51	2016	46	5	92	161	35.49	4.6			no	no	no		Insulin	22.9335	22.341	23.385	25.494	28.6895	26.7805	24.38	10.687	21.2265	23.3165	25.0205	23.2725	1.4465	2.039	0.995	-1.114	-4.3095	-2.4005	3.1535	1.0635	-0.6405	1.1075
D93	T2DM patients without DR	noDR		female	Kazakh	1955	66	2008	53	13	80	158	32.05	8	0.1003	70	no	no	no		Insulin	20.0647	20.115	21.8597	21.957	26.8797	24.6703	21.6277	17.256	18.291	22.587	23.743	20.361	1.563	1.51267	-0.232	-0.32933	-5.252	-3.04267	3.538	-0.75833	-1.91367	1.46767
D94	T2DM patients without DR	noDR		female	Kazakh	1960	61	2005	45	15	72	165	27.55	14		61	no	no	yes	Mother, Sister	Insulin	22.559	21.691	22.7255	24.235	29.482	26.533	24.0615	10.7395	21.0835	23.291	24.239	22.285	1.5025	2.3705	1.336	-0.1735	-5.4205	-2.4715	2.978	0.770499	-0.1775	1.7765
D95	T2DM patients without DR	noDR		female	Uzbek	1955	66	2020	65	0.17	85	165	31.22	6			no	no	yes	Brother	Metformin	21.8725	21.683	23.303	24.4195	29.1215	25.7825	23.216	11.0135	19.6695	23.2965	24.885	21.7995	1.3435	1.533	-0.087	-1.2035	-5.9055	-2.5665	3.5465	-0.0805	-1.669	1.4165
D96	T2DM patients without DR	noDR		female	Russian	1964	57	1985	21	35	72	168	25.51	6.7	0.0671	80	no	no	yes	Father	Canagliflozin	22.227	21.624	23.2285	24.7205	28.857	26.319	23.962	10.0155	20.3965	23.129	24.816	22.6375	1.735	2.338	0.7335	-0.7585	-4.895	-2.357	3.5655	0.833	-0.854	1.3245
D97	T2DM patients without DR	noDR		female	Uigur	1954	67	2013	59	7	68	159	26.9	9.3			no	no	yes	Mother	Insulin	22.523	22.4675	23.964	25.412	29.555	26.7395	24.9435	11.053	21.78	23.491	24.9645	23.1175	2.4205	2.476	0.979501	-0.4685	-4.6115	-1.796	3.1635	1.4525	-0.021	1.826
D98	T2DM patients without DR	noDR		female	Kazakh	1973	48	2010	37	10	58	165	21.3	6.2	0.0663	95	no	no	no		Insulin	21.2	21.2453	22.4253	23.8647	27.1843	26.7447	23.54	17.706	20.765	23.587	23.999	22.797	2.34	2.29467	1.11467	-0.32467	-3.64433	-3.20467	2.91067	0.088667	-0.323	0.879333
C1	Healthy donor			female	Kazakh	1963	56										no	no		nd		19.8453	20.565	21.9477	22.699	26.1347	25.089	22.633	18.416					2.78767	2.068	0.685333	-0.066	-3.50167	-2.456
C2	Healthy donor			female	Kazakh	1961	58										no	no		nd		21.949	20.8127	22.0633	23.473	26.9437	25.779	23.422	18.532	20.884	23.382	24.214	22.627	1.473	2.60933	1.35867	-0.051	-3.52167	-2.357	2.73533	0.238	-0.59467	0.992333
C3	Healthy donor			female	Kazakh	1961	58										no	no		nd		19.8563	19.684	21.1077	22.481	25.5273	24.428	21.605	17.9603	19.474	22.516	23.216	20.707	1.74867	1.921	0.497333	-0.876	-3.92233	-2.823	2.356	-0.68667	-1.38633	1.12233
C4	Healthy donor			female	Kazakh	1961	58										no	no		nd		20.5227	19.7653	21.3577	22.396	26.3997	24.958	22.028	18.3247					1.50533	2.26267	0.670333	-0.368	-4.37167	-2.93
C5	Healthy donor			female	Kazakh	1962	57										no	no		nd		19.0107	19.1183	20.196	21.796	24.292	22.841	20.2707	19.168	18.342	20.764	21.864	19.399	1.26	1.15233	0.074667	-1.52533	-4.02133	-2.57033	1.838	-0.584	-1.68433	0.781001
C6	Healthy donor			female	Kazakh	1962	57										no	no		nd		20.6597	20.9923	22.0917	23.6263	26.636	25.8763	23.5337	19.893	20.639	22.957	23.894	22.02	2.874	2.54133	1.442	-0.09267	-3.10233	-2.34267	2.55	0.232334	-0.705	1.16933
C7	Healthy donor			female	Kazakh	1963	56										no	no		nd		19.7767	19.8763	21.2677	21.8777	26.1597	25.4303	22.705	18.7767	18.992	22.169	23.201	21.556	2.92833	2.82867	1.43733	0.827333	-3.45467	-2.72533	3.963	0.786	-0.24633	1.39833
C8	Healthy donor			female	Kazakh	1963	56										no	no		nd		21.748	21.4963	22.6793	24.332	28.1113	26.188	24.275	19.54	21.662	24.033	24.197	23.062	2.527	2.77867	1.59567	-0.057	-3.83633	-1.913	2.71567	0.345334	0.181334	1.31633
C9	Healthy donor			male	Kazakh	1962	60				58	160	22.66				20	no	no			24.1635	24.103	25.4465	26.217	30.5265	27.6355	25.6915	12.4935	22.217	24.928	26.5235	24.3265	1.528	1.5885	0.244999	-0.5255	-4.835	-1.944	3.4745	0.763499	-0.832	1.365
C10	Healthy donor			female	Kazakh	1952	70				50	150	22.22				no	no	no			22.3905	21.5975	23.284	24.6905	28.9275	25.8945	23.725	10.048	20.529	23.052	24.848	22.5535	1.3345	2.1275	0.441	-0.9655	-5.2025	-2.1695	3.196	0.673	-1.123	1.1715
C11	Healthy donor			male	Kazakh	1951	71				70	152	30.3				30	no	no			23.0585	21.9675	23.0935	24.3475	28.8935	26.0025	23.403	10.284	20.352	23.2335	24.5155	22.325	0.344501	1.4355	0.3095	-0.9445	-5.4905	-2.5995	3.051	0.169499	-1.1125	1.078
C12	Healthy donor			female	Kazakh	1966	56				70	165	25.71				no	on holidays	no			24.7275	23.2105	24.5145	26.4385	29.872	27.381	24.92	11.245	21.7805	24.021	25.273	23.24	0.1925	1.7095	0.4055	-1.5185	-4.952	-2.461	3.1395	0.899	-0.353	1.68
C13	Healthy donor			female	Kazakh	1969	53				90	154	37.95				4	on holidays	yes	Mother		22.68	22.0885	23.2135	24.462	28.7245	26.7445	23.5645	10.727	20.098	23.593	24.765	21.9225	0.8845	1.476	0.351	-0.8975	-5.16	-3.18	3.4665	-0.0285	-1.2005	1.642
C14	Healthy donor			female	Kazakh	1968	54				65	165	23.88				no	on holidays	no			22.4568	21.2244	22.8624	24.129	28.2021	26.0911	23.3333	10.447	20.0129	22.8719	24.286	22.2353	0.876412	2.10885	0.470862	-0.79577	-4.86884	-2.7578	3.32041	0.46139	-0.95279	1.098
C15	Healthy donor			female	Kazakh	1978	44				73	165	26.81				no	on holidays	yes	Father		23.2912	22.0862	23.7237	25.1468	29.7979	27.4255	25.085	10.8776	21.4926	23.2915	24.8413	23.8262	1.79377	2.99877	1.36126	-0.06185	-4.71296	-2.34052	3.5924	1.79348	0.243717	1.25881
C16	Healthy donor			male	Kazakh	1962	60				74	162	28.2				15	on holidays	no			22.1478	22.2284	23.161	25.0346	28.8977	26.8002	24.3713	10.3058	21.3403	22.8039	24.2831	23.1069	2.22349	2.14293	1.21027	-0.66326	-4.52639	-2.42895	3.031	1.56742	0.08818	1.26437
C17	Healthy donor			male	Kazakh	1957	65				89	165	32.69				no	no	no			25.6277	25.8736	27.1008	29.0414	33.1926	29.9357	28.8607	14.9429	24.5568	26.4002	28.0112	26.5754	3.23306	2.9872	1.75996	-0.18061	-4.33189	-1.07498	4.30393	2.46053	0.849531	2.28534
C18	Healthy donor			male	Kazakh	1965	57				70	165	25.71				6	on holidays	no			24.075	24.918	26.1595	27.646	30.891	28.757	26.512	13.4135	23.1065	25.4125	27.0775	24.7965	2.437	1.594	0.3525	-1.134	-4.379	-2.245	3.4055	1.0995	-0.5655	1.7155
C19	Healthy donor			male	Kazakh	1978	44				72	168	25.51				5	no	yes	Mother		22.516	21.7065	22.835	24.3565	28.838	25.7845	23.028	10.76	20.1325	22.896	24.359	21.7475	0.512	1.3215	0.193	-1.3285	-5.81	-2.7565	2.8955	0.132	-1.331	1.2805
C20	Healthy donor			male	Tatar	1952	70				60	179	18.73				20	on holidays	no			22.701	23.076	23.919	25.597	28.6705	26.779	24.9075	10.767	22.6685	23.469	24.8785	23.7225	2.2065	1.8315	0.988501	-0.6895	-3.763	-1.8715	2.239	1.4385	0.029	1.185
C21	Healthy donor			male	Russian	1967	55				70	169	24.51				20	on holidays	yes	Mother		22.296	22.3815	23.24	25.076	29.9715	26.443	24.042	11.05	21.1775	23.213	24.8485	22.648	1.746	1.6605	0.802001	-1.034	-5.9295	-2.401	2.8645	0.829	-0.8065	1.394
C22	Healthy donor			female	Kazakh	1956	66				74	165	27.18				no	no	no			23.875	23.519	24.701	26.9985	30.74	27.8775	25.4375	13.813	22.6745	24.4315	25.953	24.1145	1.5625	1.9185	0.7365	-1.561	-5.3025	-2.44	2.763	1.006	-0.5155	1.323
C23	Healthy donor			male	Kazakh	1955	67				80	167	28.69				20	on holidays	no			22.8745	22.807	23.4165	25.4275	28.802	27.2315	24.4605	11.94	21.753	23.668	25.027	23.126	1.586	1.6535	1.044	-0.967	-4.3415	-2.771	2.7075	0.7925	-0.5665	1.3345
C24	Healthy donor			male	Kazakh	1968	54				95	174	31.38				no	no	no			22.9475	22.577	23.595	25.242	29.138	26.7775	24.385	10.652	21.126	23.393	24.7925	22.954	1.4375	1.808	0.79	-0.857	-4.753	-2.3925	3.259	0.992001	-0.4075	1.431
C25	Healthy donor			male	Kazakh	1956	66				83	167	29.76				no	no	no			23.746	22.3145	23.7775	26.1595	29.2565	27.5475	24.8345	13.2875	21.6715	23.856	25.1165	23.394	1.0885	2.52	1.057	-1.325	-4.422	-2.713	3.163	0.9785	-0.282	1.4405
C26	Healthy donor			male	Kazakh	1964	58				85	167	30.48				10	on holidays	no			23.967	22.7115	24.2245	25.7765	30.3585	27.532	24.9385	13.328	21.5045	23.7325	25.2145	23.38	0.971499	2.227	0.713999	-0.838	-5.42	-2.5935	3.434	1.206	-0.276	1.5585
C27	Healthy donor			male	Kazakh	1958	64				87	160	33.98				no	no	yes	Mother		23.345	23.199	23.988	26.246	29.2955	27.6695	24.2085	13.0575	21.7705	23.818	25.285	23.2305	0.8635	1.0095	0.2205	-2.0375	-5.087	-3.461	2.438	0.3905	-1.0765	0.978
C28	Healthy donor			male	Kazakh	1955	67				78	175	25.47				20	no	no			22.6485	22.267	23.541	25.4195	29.5535	26.679	24.0495	14.655	21.32	23.569	24.9435	23.139	1.401	1.7825	0.5085	-1.37	-5.504	-2.6295	2.7295	0.480499	-0.894	0.9105
C29	Healthy donor			male	Kazakh	1953	69				95	170	32.87				no	no	no			23.6715	23.127	24.361	25.9305	29.9805	27.5725	25.1965	16.7645	21.5585	24.1485	25.399	23.286	1.525	2.0695	0.8355	-0.734	-4.784	-2.376	3.638	1.048	-0.2025	1.9105
C30	Healthy donor			female	Kazakh	1956	66				60	155	24.97				no	no	no			26.104	26.6605	27.81	30.3145	31.1145	30.299	27.841	15.6245	25.569	26.448	28.1705	26.5255	1.737	1.1805	0.031	-2.4735	-3.2735	-2.458	2.272	1.393	-0.3295	1.3155
