# Supplementary material for: Circulating microRNAs demonstrate limited diagnostic potential for diabetic retinopathy in the population of Kazakhstan
Source: PeerJ. 2025 Apr 11;13:e19259. doi: 10.7717/peerj.19259 (PMC11995893; doi:10.7717/peerj.19259)
Supplement: Supplemental Information 2 [file peerj-13-19259-s002.xlsx]

## Sheet: NormFinder relults
DR patients vs. noDR patients + Controls
Gene name	Stability value	Intragroup variation		Intergroup variation
		DR	noDR+C	DR	noDR+C
hsa-miR-328-3p	0.448073	0.25554	0.471914	0.369982	-0.369982
hsa-miR-191-5p	0.417732	0.0471065	0.0618226	0.386716	-0.386716
ath-miR-159a	1.03346	5.67154	6.14152	-0.756698	0.756698
DR patients + noDR patients vs. Controls
Gene name	Stability value	Intragroup variation		Intergroup variation
		DR+noDR	C	DR+noDR	C
hsa-miR-328-3p	0.260916	0.259654	1.09504	0.137854	-0.137854
hsa-miR-191-5p	0.19472	0.0532816	0.0712778	0.151042	-0.151042
ath-miR-159a	0.533996	6.94818	8.45362	-0.288896	0.288896
DR patients + Controls vs. noDR patients
Gene name	Stability value	Intragroup variation		Intergroup variation
		DR+C	noDR	DR+C	noDR
hsa-miR-328-3p	0.386189	0.421421	0.302594	0.307692	-0.307692
hsa-miR-191-5p	0.350118	0.0520669	0.0598213	0.318511	-0.318511
ath-miR-159a	0.897326	6.96109	5.5417	-0.626203	0.626203
all
Gene name	Stability value	Standard error
hsa-miR-328-3p	0.597999	0.0981258
hsa-miR-191-5p	0.235052	0.23309
ath-miR-159a	2.68007	0.124201

## Sheet: GeNorm results
Gene name	Expression stability measure M
hsa-miR-328-3p	2.32
hsa-miR-191-5p	2.254
ath-miR-159a	3.896
